# Supplementary material for: Novel Eu3+-activated Ca3Ga2Ge4O14 red-emitting phosphors with high quantum efficiency for plant growth lighting and white LEDs
Source: Royal Society of Chemistry journal article supplement (doi:10.1039/d4dt02207f), 2024-01-01
Supplement: d4dt02207f1.pdf [file d4dt02207f1.pdf]

Supplementary materials for

## Novel Eu<sup>3+</sup>-activated Ca<sub>3</sub>Ga<sub>2</sub>Ge<sub>4</sub>O<sub>14</sub> red-emitting phosphors with high quantum efficiency for plant growth lighting and white LEDs

Xiaohua Li<sup>a,b</sup>, Jina Ding<sup>a,\*</sup>, Qifeng Zeng<sup>b</sup>, Xinyi Lin<sup>b</sup>, Linwen Jiang<sup>b</sup>, Anhua Wu<sup>c</sup>

<sup>a</sup>State Key Laboratory for Managing Biotic and Chemical Threats to the Quality and Safety of Agro-products, Institute of Plant Virology, Ningbo University, Ningbo 315211, P. R. China

<sup>b</sup>School of Materials Science and Chemical Engineering, State Key Laboratory Base of Novel Functional Materials and Preparation Science, Ningbo University, Ningbo 315211, P. R. China

<sup>c</sup>Shanghai Institute of Ceramics, Chinese Academy of Sciences, Shanghai 201800, P. R. China

**Tab. S1.** The lattice parameters of Ca<sub>3</sub>Ga<sub>2</sub>Ge<sub>4</sub>O<sub>14</sub>: xEu<sup>3+</sup>.

| (Ca <sub>1-x</sub> Eu <sub>x</sub> ) <sub>3</sub> Ga <sub>2</sub> Ge <sub>4</sub> O <sub>14</sub> | a = b(Å) | c (Å)   | V(Å <sup>3</sup> ) | α, β, γ               |
|---------------------------------------------------------------------------------------------------|----------|---------|--------------------|-----------------------|
| 0                                                                                                 | 8.06877  | 4.97158 | 280.31             | α = β = 90°, γ = 120° |
| 0.01                                                                                              | 8.05892  | 4.93866 | 277.78             | α = β = 90°, γ = 120° |
| 0.03                                                                                              | 8.03490  | 4.95230 | 276.88             | α = β = 90°, γ = 120° |
| 0.05                                                                                              | 8.05927  | 4.92006 | 276.75             | α = β = 90°, γ = 120° |
| 0.07                                                                                              | 8.03526  | 4.94375 | 276.43             | α = β = 90°, γ = 120° |
| 0.09                                                                                              | 8.07939  | 4.88786 | 276.32             | α = β = 90°, γ = 120° |
| 0.12                                                                                              | 8.05359  | 4.91803 | 276.25             | α = β = 90°, γ = 120° |
| 0.15                                                                                              | 8.06559  | 4.87423 | 274.61             | α = β = 90°, γ = 120° |
| 0.20                                                                                              | 8.05740  | 4.87776 | 274.25             | α = β = 90°, γ = 120° |

**Tab. S2.** The chromaticity coordinates, CCT and color purity at different Eu<sup>3+</sup> doping concentrations of CGG.

| NO. | (Ca <sub>1-x</sub> Eu <sub>x</sub> ) <sub>3</sub> Ga <sub>2</sub> Ge <sub>4</sub> O <sub>14</sub> | CIE (x, y)       | CCT(K) | Color purity (%) |
|-----|---------------------------------------------------------------------------------------------------|------------------|--------|------------------|
| 1   | 0.01                                                                                              | (0.5936, 0.4015) | 1628   | 91.34%           |
| 2   | 0.03                                                                                              | (0.6063, 0.3888) | 1629   | 94.08%           |

\*Corresponding author.

E-mail addresses: dingjina@nbu.edu.cn (Jina Ding).

|   |      |                  |      |        |
|---|------|------------------|------|--------|
| 3 | 0.05 | (0.6155, 0.3816) | 1668 | 96.35% |
| 4 | 0.07 | (0.6202, 0.3767) | 1709 | 96.47% |
| 5 | 0.09 | (0.6178, 0.3785) | 1690 | 96.86% |
| 6 | 0.12 | (0.6217, 0.3761) | 1719 | 97.89% |
| 7 | 0.15 | (0.6211, 0.3756) | 1720 | 97.68% |
| 8 | 0.20 | (0.6289, 0.3690) | 1811 | 96.68% |

**Tab. S3.** Some reported red emitting phosphors for w-LEDs.

| Activator             | Compound                                                                | $\lambda_{\text{ex}}$<br>(nm) | $\lambda_{\text{em}}$<br>(nm) | Color purity<br>(%) | QY    | Ref.      |
|-----------------------|-------------------------------------------------------------------------|-------------------------------|-------------------------------|---------------------|-------|-----------|
| 12% Eu <sup>3+</sup>  | Ca <sub>3</sub> Ga <sub>2</sub> Ge <sub>4</sub> O <sub>14</sub>         | 394                           | 618                           | 97.89               | 94.26 | This work |
| 5% Eu <sup>3+</sup>   | Na <sub>2</sub> Tb <sub>0.5</sub> (MoO <sub>4</sub> )(PO <sub>4</sub> ) | 394                           | 614                           | 95.30               | 43.60 | [1]       |
| 6% Eu <sup>3+</sup>   | Y <sub>2</sub> SiWO <sub>8</sub>                                        | 395                           | 619                           | 96.61               | 14.80 | [2]       |
| 2.5% Eu <sup>3+</sup> | Na <sub>5</sub> W <sub>3</sub> O <sub>9</sub> F <sub>5</sub>            | 466                           | 607                           | 97.44               | 29.10 | [3]       |
| 40% Eu <sup>3+</sup>  | Ca <sub>2</sub> GdTaO <sub>6</sub>                                      | 396                           | 615                           | 96.00               | 83.00 | [4]       |
| 50% Eu <sup>3+</sup>  | Ca <sub>2</sub> GdSbO <sub>6</sub>                                      | 396                           | 612                           | 94.90               | 73.00 | [5]       |

## References

- [1] Z. Guo, Z. C. Wu, B. Milićević, L. Zhou, W. U. Khan, J. Hong, J. Shi, M. Wu, Na<sub>2</sub>Tb<sub>0.5</sub>(MoO<sub>4</sub>)(PO<sub>4</sub>): 0.5Eu<sup>3+</sup>: A red-emitting phosphor with both high thermal stability and high colour purity, *Opt. Mater.* 97 (2019) 109376.
- [2] S. Wang, C. Xu, X. Qiao, High thermal stability and color purity of red-emitting phosphor Y<sub>2</sub>SiWO<sub>8</sub>: Eu<sup>3+</sup> for w-LEDs: Synthesis and photoluminescence properties, *Ceram. Int.* 47 (2021) 1063-1075.
- [3] G. Wu, J. Xue, X. Li, Q. Bi, M. Sheng, Z. Leng, A novel red-emitting Na<sub>5</sub>W<sub>3</sub>O<sub>9</sub>F<sub>5</sub>: Eu<sup>3+</sup> phosphor with high color purity for blue-based WLEDs, *Ceram. Int.* 49 (2023) 10615-10624.
- [4] S. Wang, Q. Sun, B. Devakumar, J. Liang, L. Sun, X. Huang, Novel highly efficient and thermally stable Ca<sub>2</sub>GdTaO<sub>6</sub>: Eu<sup>3+</sup> red-emitting phosphors with high color purity for UV/blue-excited WLEDs, *J. Alloy. Compd.* 804 (2019) 93-99.
- [5] Z. Zhang, L. Sun, B. Devakumar, J. Liang, S. Wang, Q. Sun, S. J. Dhoble, X. Huang, Novel highly luminescent double-perovskite Ca<sub>2</sub>GdSbO<sub>6</sub>: Eu<sup>3+</sup> red phosphors with high color purity for white LEDs: Synthesis, crystal structure, and photoluminescence properties, *J. Lumin.* 221 (2020) 117105.

**Tab. S4.** CCT, CRI and color coordinates of prepared white-LEDs as a function of currents.

| Current | CCT    | CRI   | CIE <i>x</i> | CIE <i>y</i> |
|---------|--------|-------|--------------|--------------|
| 20 mA   | 4808 K | 91.64 | 0.3514       | 0.3604       |
| 40 mA   | 4921 K | 90.78 | 0.3479       | 0.3571       |
| 60 mA   | 5008 K | 90.44 | 0.3453       | 0.3550       |
| 80 mA   | 5058 K | 90.19 | 0.3439       | 0.3537       |
| 100 mA  | 5096 K | 90.00 | 0.3428       | 0.3527       |

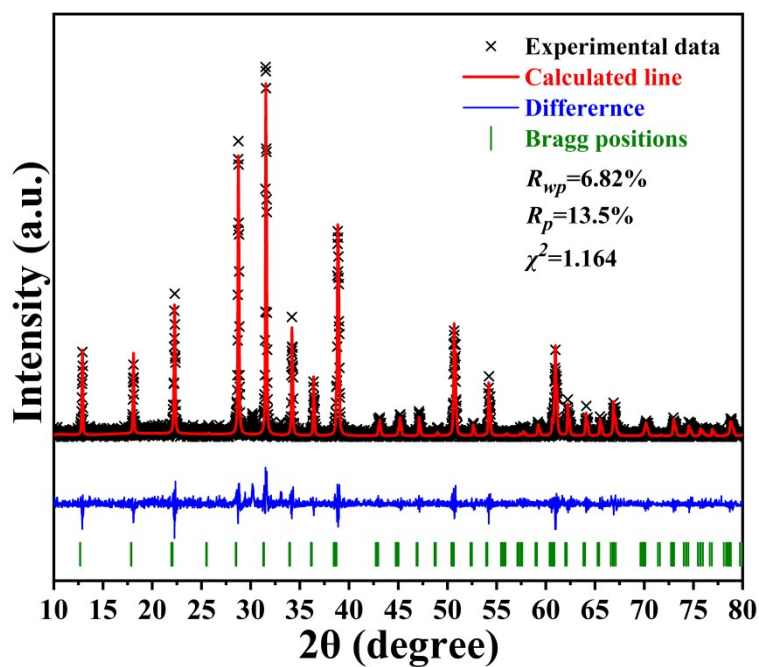

**Fig. S1** XRD Rietveld refinement patterns of CGG: 12%Eu<sup>3+</sup>.

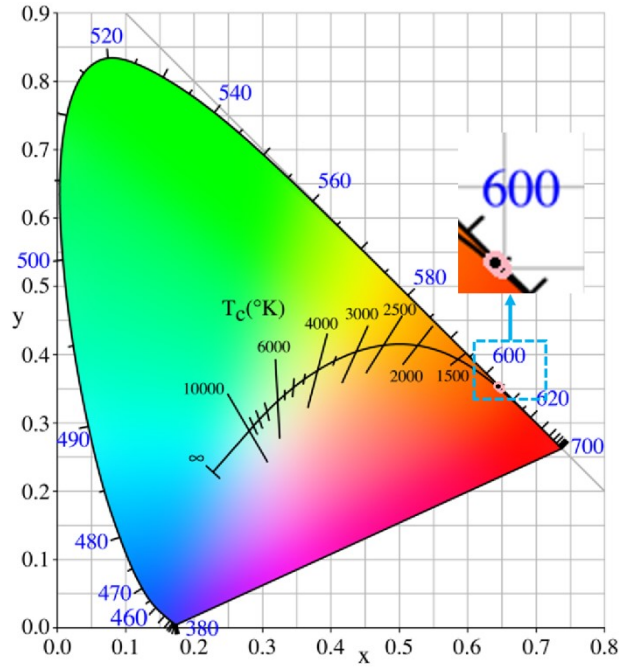

**Fig. S2** The CIE coordinates at different temperatures from 303 K to 483 K.

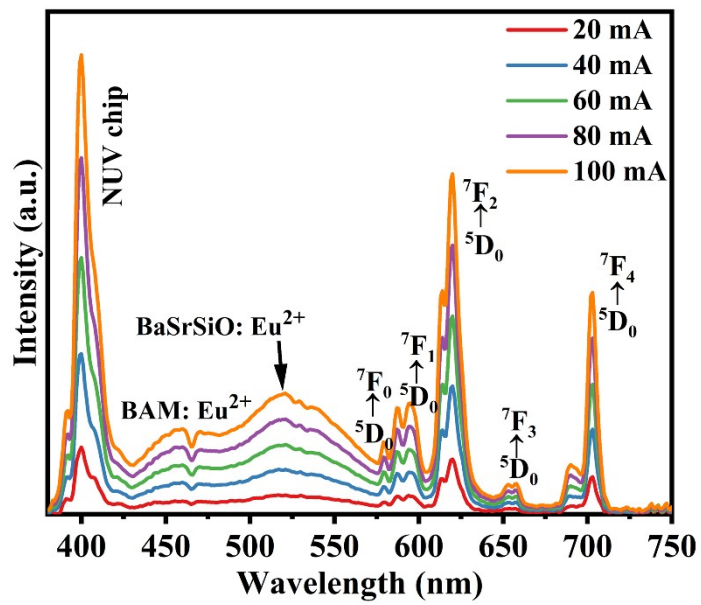

**Fig. S3** The EL emission spectra of the developed w-LEDs under 20-100 mA injected current.

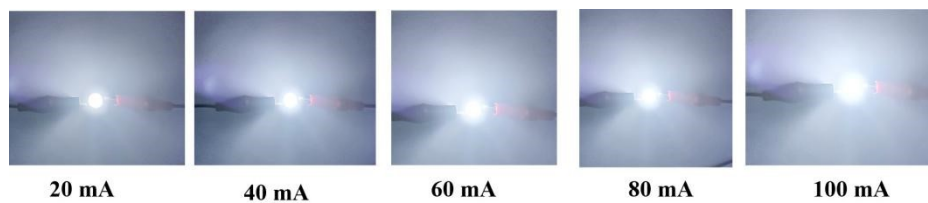

**Fig. S4** The photos of the developed w-LEDs under 20-100 mA injected current.
